# Supplementary material for: Effectiveness of complete primary vaccination against COVID-19 at primary care and community level during predominant Delta circulation in Europe: multicentre analysis, I-MOVE-COVID-19 and ECDC networks, July to August 2021
Source: PubMed Central journal article supplement (PMC9137272; doi:10.2807/1560-7917.es.2022.27.21.2101104), 2022-05-26
Supplement: 21-01104_KISSLING_Supplement.pdf [file 21-01104_KISSLING_Supplement.pdf]

This supplementary material is hosted by *Eurosurveillance* as supporting information alongside the article “Effectiveness of complete primary vaccination against COVID-19 at primary care and community level during predominant Delta circulation in Europe: multicentre analysis, I-MOVE-COVID-19 and ECDC networks, July to August 2021” on behalf of the authors who remain responsible for the accuracy and appropriateness of the content. The same standards for ethics, copyright, attributions and permissions as for the article apply. Supplements are not edited by *Eurosurveillance* and the journal is not responsible for the maintenance of any links or email addresses provided therein.

**Supplementary table 1:** Characteristics of study sites in the I-MOVE-COVID-19 and ECDC primary care multicentre networks included in this analysis, July-August 2021 (n=10)

| <b>Country</b>           | <b>Study site</b> | <b>Comprehensive /sentinel / self-selected</b> | <b>Primary care physician (PC) / community (C)</b> | <b>Site of swab collection</b>        | <b>Selection of patients</b><br>All (A), Systematic sample (S), Self-selected (SS) | <b>Vaccines used in study population<sup>a</sup></b><br>Cominarty (C), Vaxzevria (V), Spikevax (S), Janssen (J) | <b>Source of all information</b><br>Electronic medical records (E), vaccine registry (V), GP interview (GP), patient questionnaire (P), other health databases, including national laboratory databases (H) | <b>Lab tests used</b><br>RT-PCR (PCR), rapid antigen test (RAT) |
|--------------------------|-------------------|------------------------------------------------|----------------------------------------------------|---------------------------------------|------------------------------------------------------------------------------------|-----------------------------------------------------------------------------------------------------------------|-------------------------------------------------------------------------------------------------------------------------------------------------------------------------------------------------------------|-----------------------------------------------------------------|
| <b>Croatia</b>           | HR                | Sentinel                                       | PC                                                 | At medical laboratory or by physician | A                                                                                  | C, V, S, J                                                                                                      | E, V, GP                                                                                                                                                                                                    | PCR                                                             |
| <b>England</b>           | EN                | Sentinel                                       | PC                                                 | By physician                          | S                                                                                  | C, V                                                                                                            | E, V                                                                                                                                                                                                        | PCR                                                             |
| <b>France</b>            | FR                | Sentinel                                       | PC                                                 | At medical laboratory or by physician | A                                                                                  | C, V, S, J                                                                                                      | E, GP                                                                                                                                                                                                       | PCR, RAT                                                        |
| <b>Ireland</b>           | IE                | Sentinel                                       | PC                                                 | At COVID-19 testing centre            | S                                                                                  | C, V, S                                                                                                         | V, GP, H                                                                                                                                                                                                    | PCR                                                             |
| <b>The Netherlands</b>   | NL-CO             | Self-selected                                  | C                                                  | At COVID-19 testing centre            | SS                                                                                 | C, V, S, J                                                                                                      | P, E                                                                                                                                                                                                        | PCR, RAT                                                        |
| <b>Portugal</b>          | PT                | Sentinel                                       | PC                                                 | At COVID-19 testing centre            | S                                                                                  | C, V, S                                                                                                         | GP, H, V, E                                                                                                                                                                                                 | PCR, RAT                                                        |
| <b>Romania</b>           | RO                | Sentinel                                       | PC                                                 | By physician                          | S                                                                                  | C, V, S, J                                                                                                      | E, GP                                                                                                                                                                                                       | PCR                                                             |
| <b>Scotland</b>          | SC                | Sentinel                                       | C                                                  | At COVID-19 testing centre            | S                                                                                  | C, V                                                                                                            | E, P                                                                                                                                                                                                        | PCR                                                             |
| <b>Spain (3 regions)</b> | ES                | Sentinel                                       | PC                                                 | By physician                          | S (2 regions), A (1 region)                                                        | C, V                                                                                                            | GP, E, V                                                                                                                                                                                                    | PCR, RAT                                                        |
| <b>Spain (Navarra)</b>   | NA                | Comprehensive                                  | PC                                                 | By physician                          | A                                                                                  | C, V, S, J                                                                                                      | E, V                                                                                                                                                                                                        | PCR, RAT                                                        |

<sup>a</sup> Study population between 1 July and 31 August 2021. Other vaccines may have been used in these countries, but were not captured within this study

**Supplementary Figure S1:** Flowchart of exclusions for participants in the I-MOVE-COVID-19 and ECDC primary care multicentre network study, July-August 2021

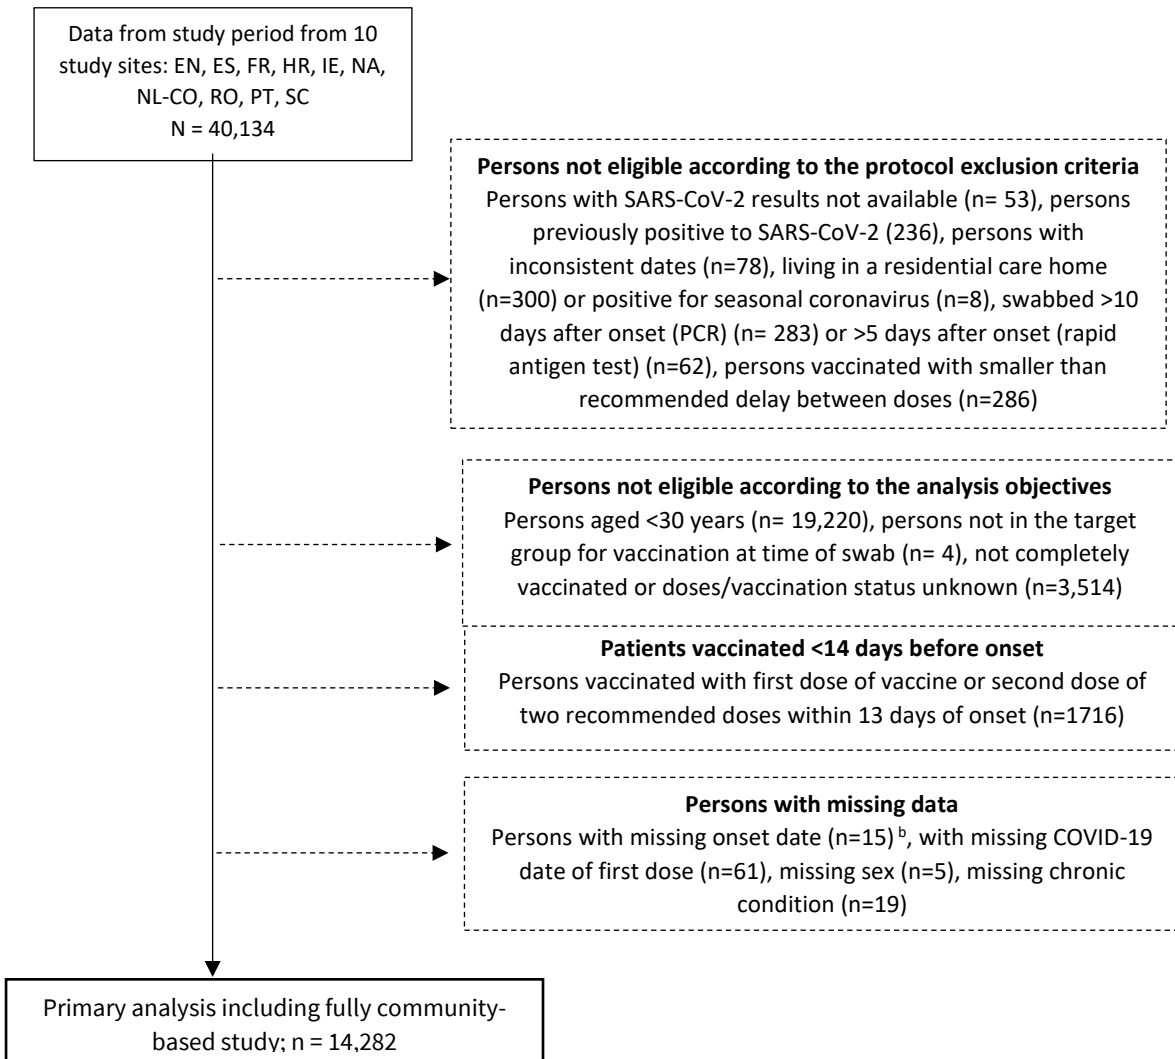

a In NA these patients were excluded prior to sending to the central hub and not included in the flowchart.

b Onset dates were imputed in NA, IE, PT.

**Supplementary Figure S2:** Completely vaccinated patients by case status and days between complete vaccination and symptom onset, I-MOVE-COVID-19 and ECDC primary care and community multicentre networks, July–August 2021

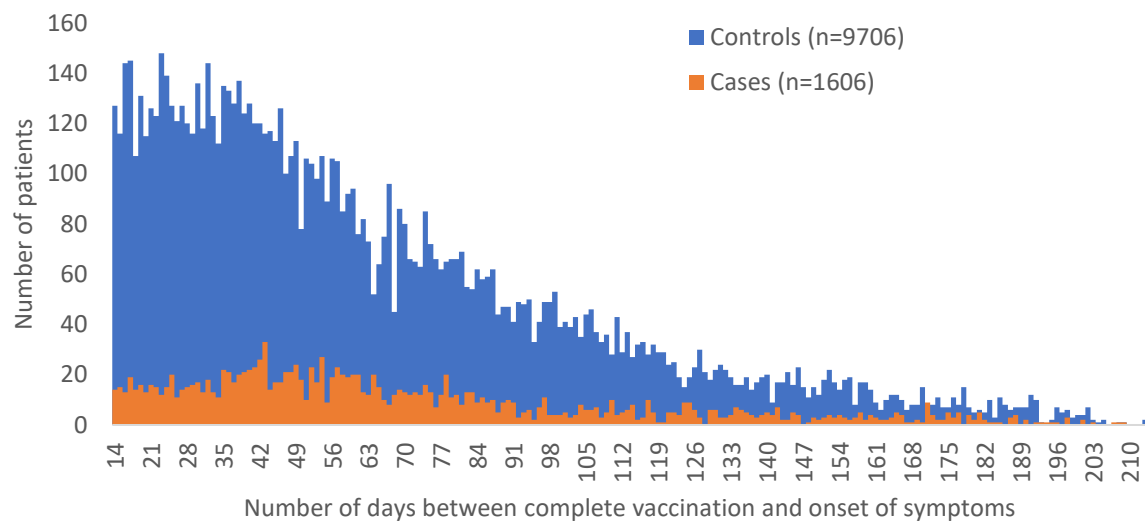

Table S2: Effectiveness of complete COVID-19 vaccination among participants in the primary care and community I-MOVE-COVID-19 and ECDC VE study, by age group and vaccine product, **restricted to those tested by RT-PCR only**, Europe, July–August 2021

| Vaccine brand                               | Analysis type                   | Cases; vaccinated/<br>controls; vaccinated | Crude VE (95% CI) <sup>a</sup> | Adjusted VE<br>(95% CI) <sup>b</sup> |
|---------------------------------------------|---------------------------------|--------------------------------------------|--------------------------------|--------------------------------------|
| <b>Age group-specific analysis</b>          |                                 |                                            |                                |                                      |
| <b>All vaccines<sup>c</sup></b>             | Ages 30 years and older         | 1789;1276/3664;3222                        | 66 (60-71)                     | 65 (57-71)                           |
|                                             | 30–44 years                     | 571;225/871;575                            | 61 (49-69)                     | 59 (47-69)                           |
|                                             | 45–59 years                     | 701;572/1350;1259                          | 73 (63-81)                     | 73 (62-80)                           |
|                                             | 60+ years                       | 517;479/1434;1385                          | 58 (28–75)                     | 55 (23–73)                           |
| <b>Comirnaty<sup>d</sup></b>                | 30–59 years                     | 936;461/1505;1112                          | 69 (63-75)                     | 70 (62-76)                           |
|                                             | 60 years and older              | 335;297/849;800                            | 63 (36-79)                     | 57 (24-76)                           |
| <b>Vaxzevria<sup>d</sup></b>                | 30–59 years                     | 534;121/677;327                            | 57 (43-68)                     | 59 (44-70)                           |
|                                             | 60 years and older              | 160;126/500;454                            | 56 (22-75)                     | 61 (30-78)                           |
| <b>Spikevax<sup>d</sup></b>                 | 30–59 years                     | 495;32/552;177                             | 84 (75-89)                     | 85 (75-90)                           |
|                                             | 60 years and older              | 47;17/90;58                                | NC                             | NC                                   |
| <b>COVID-19 Vaccine Janssen<sup>e</sup></b> | 30–59 years                     | 537;172/475;179                            | 9 (-22-32)                     | 26 (-4-48)                           |
|                                             | 60 years and older <sup>e</sup> | 60;34/46;20                                | NC                             | NC                                   |
| <b>Chronic condition-specific analysis</b>  |                                 |                                            |                                |                                      |

|                                                 |                                                             |                    |             |             |
|-------------------------------------------------|-------------------------------------------------------------|--------------------|-------------|-------------|
| <b>All vaccines<sup>f</sup></b>                 | <b>Presence of chronic condition,</b><br>30–59 years        | 204;148/416;363    | 53 (25-71)  | 38 (-4-63)  |
|                                                 | <b>Absence of chronic condition,</b><br>30–59 years         | 1050;642/1690;1387 | 65 (58-72)  | 68 (60-75)  |
|                                                 | <b>Presence of chronic condition,</b><br>60 years and older | 220;209/591;576    | 43 (-39-76) | 41 (-44-76) |
|                                                 | <b>Absence of chronic condition,</b><br>60 years and older  | 286;263/818;787    | 63 (26-81)  | 61 (23-81)  |
| <b>Comirnaty</b>                                | <b>Presence of chronic condition,</b><br>30–59 years        | 149;93/304;251     | 62 (37-77)  | 51 (15-72)  |
|                                                 | <b>Absence of chronic condition,</b><br>30–59 years         | 787;368/1174;842   | 71 (63-76)  | 73 (66-79)  |
| <b>Vaxzevria<sup>g</sup></b>                    | <b>Absence of chronic condition,</b><br>30–59 years         | 474;110/601;301    | 59 (45-70)  | 62 (47-73)  |
| <b>Spikevax<sup>g</sup></b>                     | <b>Absence of chronic condition,</b><br>30–59 years         | 436;28/454;132     | 82 (71-89)  | 84 (73-90)  |
| <b>COVID-19 Vaccine<br/>Janssen<sup>g</sup></b> | <b>Absence of chronic condition,</b><br>30–59 years         | 451;135/385;141    | 11 (-23-36) | 33 (0-55)   |

CI: confidence interval; COVID-19: coronavirus disease; ECDC: European Centre for Disease Prevention and Control; EN: England; ES: Spain; FR: France; HR: Croatia; IE: Ireland; NL-CO: the Netherlands community-based study; PT: Portugal; RO: Romania; SC: Scotland; NA: Navarre; NC: not calculated; VE: vaccine effectiveness.

<sup>a</sup> Adjusted by study site, swab date.

<sup>b</sup> Adjusted by study site, swab date, 10-year age group, presence of chronic condition, sex.

<sup>c</sup> Six controls dropped from the 30–44 years (RO), four controls dropped from the 45–59 years (RO), and two cases dropped from the 75 years and older analysis (RO).

<sup>d</sup> Only countries included where at least one study participant in the age group for analysis had received the vaccine under study. Comirnaty: EN, ES, FR, HR, IE, NA, NL-CO, PT, RO, SC; Vaxzevria: EN, ES, FR, HR (30–59-year-olds only), IE, NA, NL-CO, PT, SC; Spikevax: ES, FR, HR (30–59-year-olds only), IE (30–59-year-olds only), NA, NL-CO, PT, RO (60 years and older only), SC (30–59-year-olds only); COVID-19 Vaccine Janssen: ES, FR, HR, IE, NA, NL-CO, PT

<sup>e</sup> VE was not computed for COVID-19 Vaccine Janssen among those aged 60 and older, as only one country was left in the analysis.

<sup>f</sup> Countries included in the 30–59 years old analysis: ES, FR, HR, NA, NL-CO, PT, SC; countries included in the 60 years and over analysis: EN, ES, FR, IE, NA, NL-CO, RO, SC

<sup>g</sup> Sample size too small to estimate VE among those with chronic condition.

**Table S3:** Effectiveness of complete COVID-19 vaccination among participants in the primary care and community I-MOVE-COVID-19 and ECDC VE study, by time since vaccination and vaccine product, **restricted to those tested by RT-PCR only**, Europe, July–August 2021

| <b>Analysis by time since vaccination</b>          |                         |                                      |                                         |
|----------------------------------------------------|-------------------------|--------------------------------------|-----------------------------------------|
| <b>Brand, age group and time since vaccination</b> | <b>Cases / controls</b> | <b>Crude VE (95% CI)<sup>a</sup></b> | <b>Adjusted VE (95% CI)<sup>b</sup></b> |
| <b>Comirnaty, age 30–59 years<sup>c,d</sup></b>    |                         |                                      |                                         |
| Unvaccinated                                       | 475/387                 |                                      |                                         |
| Vaccinated 14–29 days                              | 87/348                  | 80 (73-85)                           | 82 (75-87)                              |
| Vaccinated 30–59 days                              | 198/425                 | 65 (54-73)                           | 66 (55-75)                              |

|                                               |         |            |            |
|-----------------------------------------------|---------|------------|------------|
| Vaccinated 60–89 days                         | 46/98   | 59 (37-73) | 63 (40-77) |
| Vaccinated ≥90 days                           | 130/238 | 55 (41-66) | 54 (38-66) |
| <b>Comirnaty, age 60+ years<sup>c,d</sup></b> |         |            |            |
| Unvaccinated                                  | 38/49   |            |            |
| Vaccinated 14–29 days                         | 2/22    | NC         | NC         |
| Vaccinated 30–59 days                         | 21/147  | 68 (27-86) | 68 (21-87) |
| Vaccinated 60–89 days                         | 113/273 | 63 (31-80) | 60 (20-80) |
| Vaccinated ≥90 days                           | 158/349 | 56 (24-75) | 46 (0-70)  |

CI: confidence interval; COVID-19: coronavirus disease; ECDC: European Centre for Disease Prevention and Control; EN: England; ES: Spain; FR: France; HR: Croatia; IE: Ireland; NL-CO: the Netherlands community-based study; PT: Portugal; RO: Romania; SC: Scotland; NA: Navarre; NC: not calculated; VE: vaccine effectiveness.

<sup>a</sup> Adjusted by study site, swab date.

<sup>b</sup> Adjusted by study site, swab date, 10-year age group, presence of chronic condition, sex.

<sup>c</sup> Comirnaty: EN (30–59-year-old analysis only), ES, FR, HR, IE, NA, NL-CO, PT, RO (60 years and older analysis only), SC

<sup>d</sup> VE by time since vaccination was not estimated for Vaxzevria, Spikevax and Janssen, as sample size was sparse among several categories.

**Supplementary Figure S3:** Effectiveness of Comirnaty vaccination among participants in the primary care/community I-MOVE-COVID-19 and ECDC VE study by days between dose of complete vaccine and onset of symptoms, and by age group, **restricted to those tested by RT-PCR only**, Europe, July–August 2021

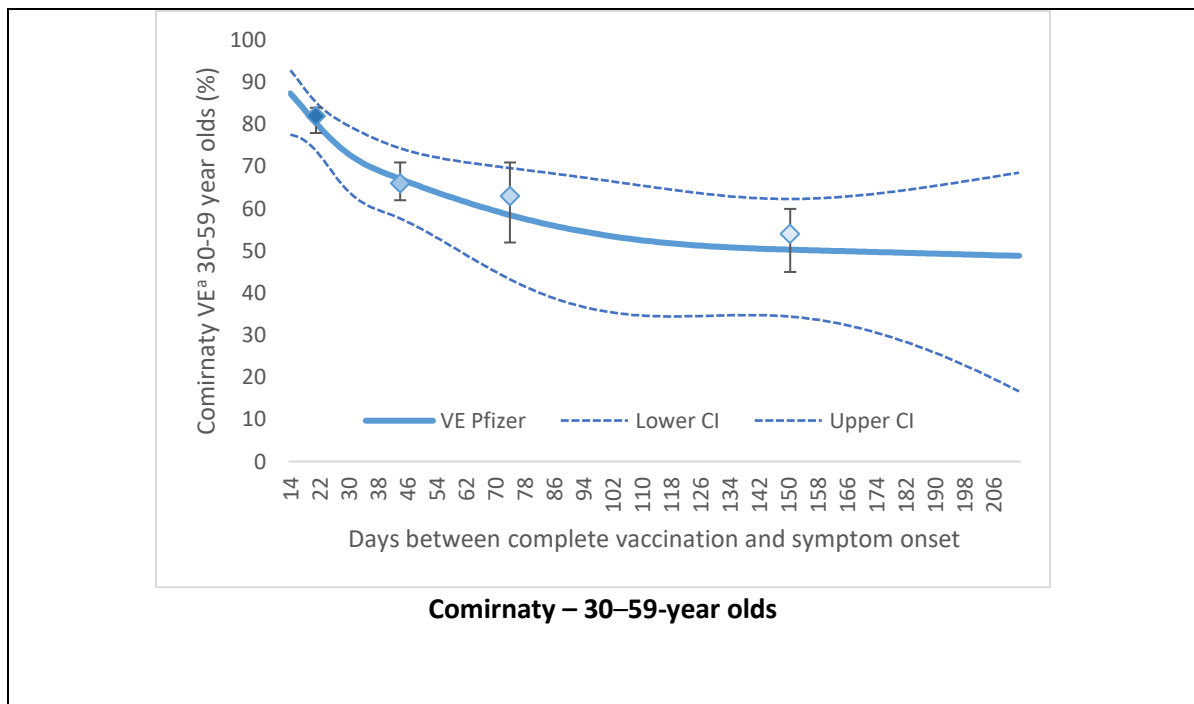

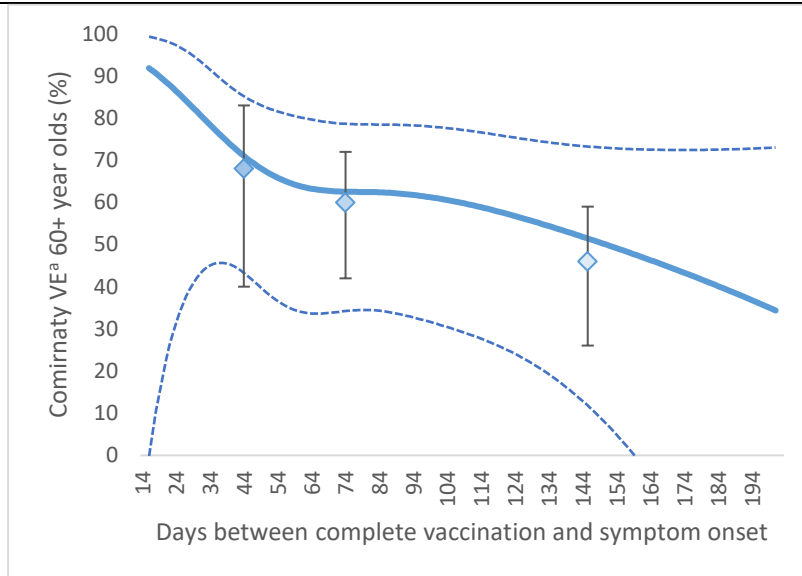

**Comirnaty – 60 years and older**

- ◆ VE 14–29 days<sup>b</sup>
- ◆ VE 30–59 days
- ◆ VE 60–89 days
- ◆ VE ≥90 days

CI: confidence interval; COVID-19: coronavirus disease; ECDC: European Centre for Disease Prevention and Control; VE: vaccine effectiveness.

<sup>a</sup>Adjusted by study site, age group, sex, date of swab and presence of chronic condition.

<sup>b</sup> Sample size was too small to measure VE for 14–29 days for Comirnaty among those aged 60 years and older
